# Supplementary material for: Human CLEC9A antibodies deliver NY-ESO-1 antigen to CD141+ dendritic cells to activate naïve and memory NY-ESO-1-specific CD8+ T cells
Source: PubMed Central journal article supplement — J Immunother Cancer. 2020 Jul 30;8(2):e000691. doi: 10.1136/jitc-2020-000691 (PMC7394304; doi:10.1136/jitc-2020-000691), 2020-07-30
Supplement: jitc-2020-000691supp001.pdf [file jitc-2020-000691supp001.pdf]

**A**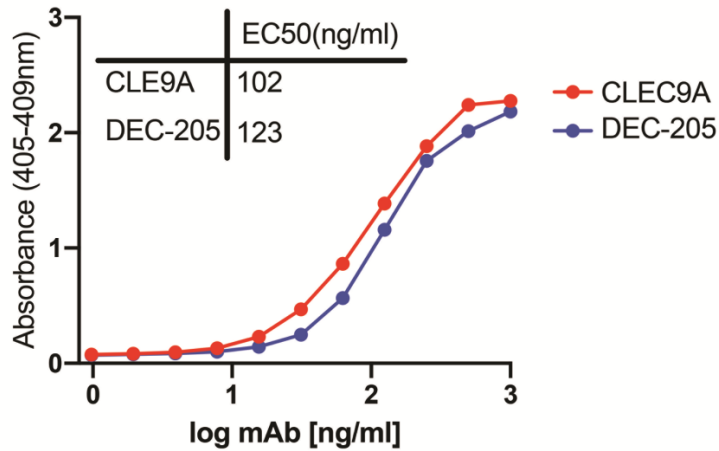**B**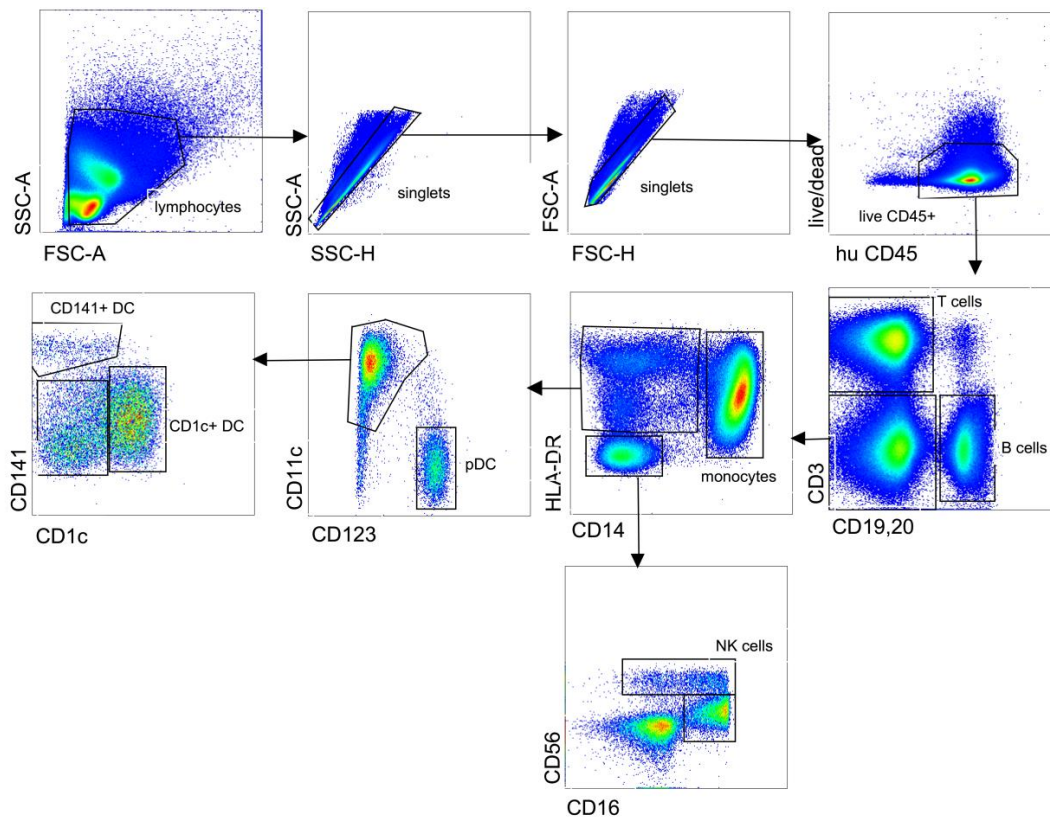

**Supplementary Figure 1** (related to Figure 1): **A.** Binding affinity of chimeric CLEC9A and DEC-205 antibodies to respective recombinant protein targets by ELISA. **B.** Gating strategy to identify cell subsets within PBMC.

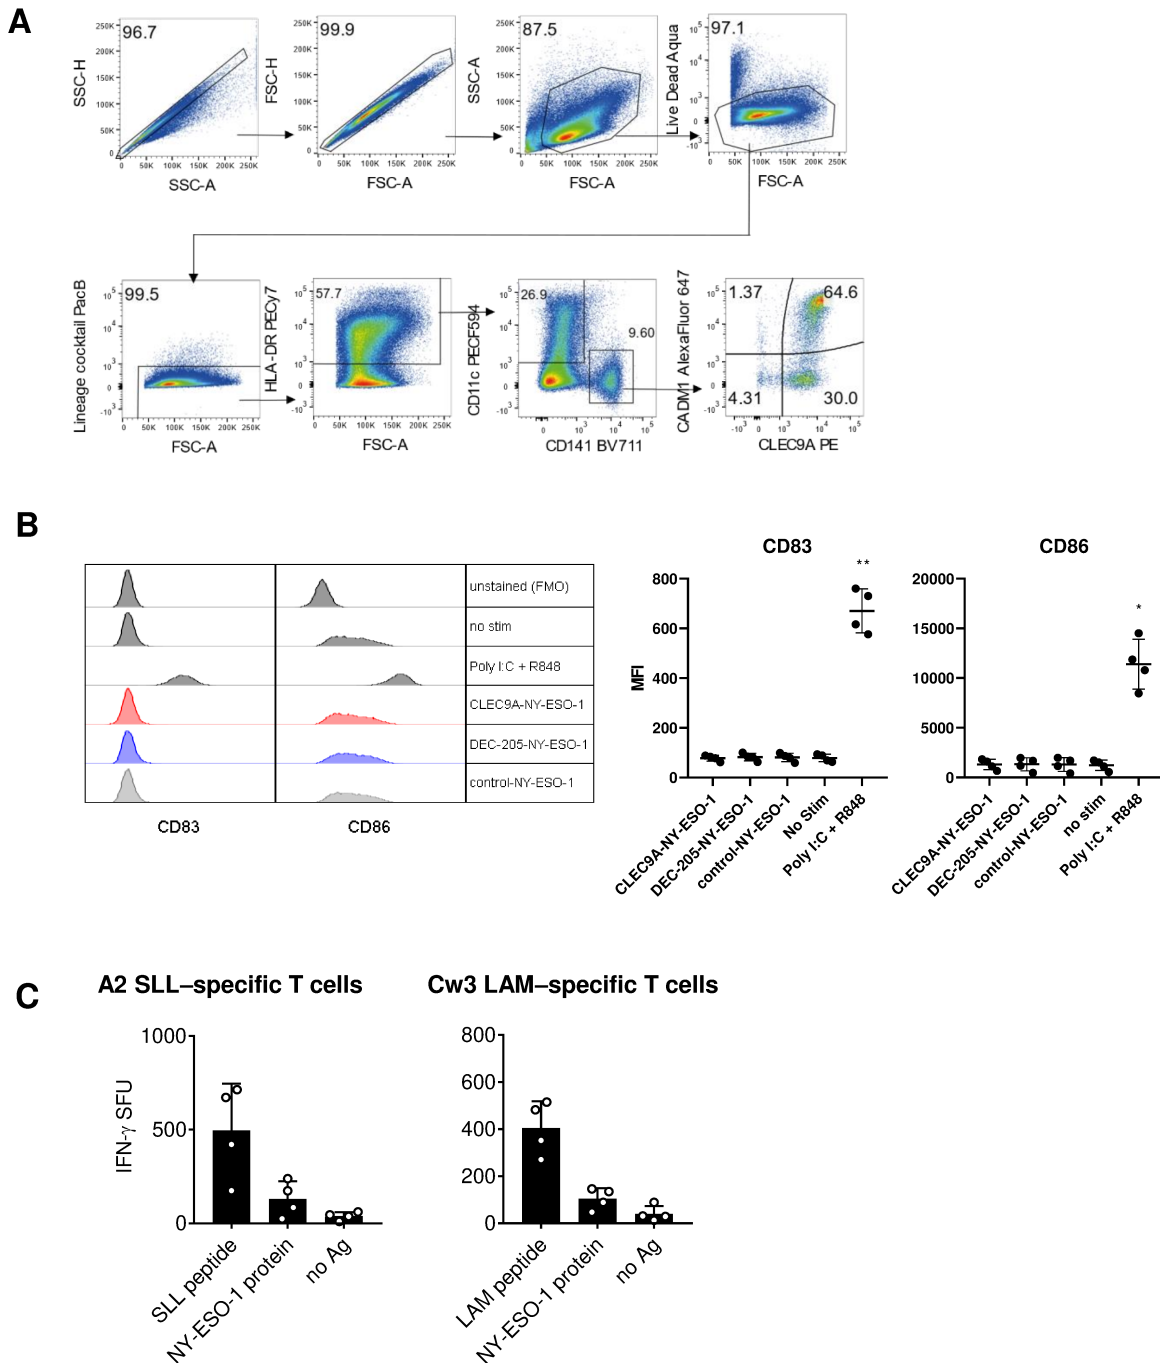

**Supplementary Figure 2 (Related to manuscript Figure 2): Generation and isolation of CD141<sup>+</sup> DC from CD34<sup>+</sup> HSC *in vitro*.** **A.** CD141<sup>+</sup> DC were identified and sorted as live, singlet cells that were lineage cocktail (CD2, CD14, CD16, CD19, CD20)<sup>-</sup>, HLA-DR<sup>+</sup>, CD11c<sup>low</sup> and CD141<sup>+</sup>. The majority of the CD141<sup>+</sup> cells expressed CD141<sup>+</sup> DC-specific markers CLEC9A and CADM1. **B.** Upregulation of CD83 and CD86 on CD141<sup>+</sup> DC after overnight incubation alone, with targeting antibodies or with poly I:C + R848. One representative (left) and mean fluorescence intensity (MFI) from 5 donors is shown (right). **C.** Activation of SLL and Cw3-specific T cell lines by IFN $\gamma$  ELISPOT following stimulation with HLA-matched CD141<sup>+</sup> DC pulsed with saturating concentrations of cognate peptide or recombinant NY-ESO-1 protein. Each data point represents the mean of triplicate wells from an individual donor. Bars represent compiled means  $\pm$  SD from 4 donors.

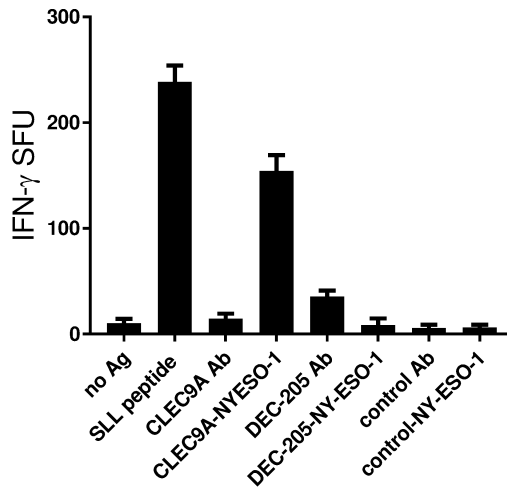

**Supplementary Fig 3:** Related to Figure 3. PBMCs from a melanoma patient with known NY-ESO-1 SLL-specific response were stimulated no Ag, SLL peptide, unconjugated or NY-ESO-1- conjugated anti-CLEC9A, DEC-205 or control ( $\beta$ -gal) Ab. IFN $\gamma$  production was measured by ELISPOT 18 hr later. Data shown are the mean  $\pm$  SD from triplicate wells.

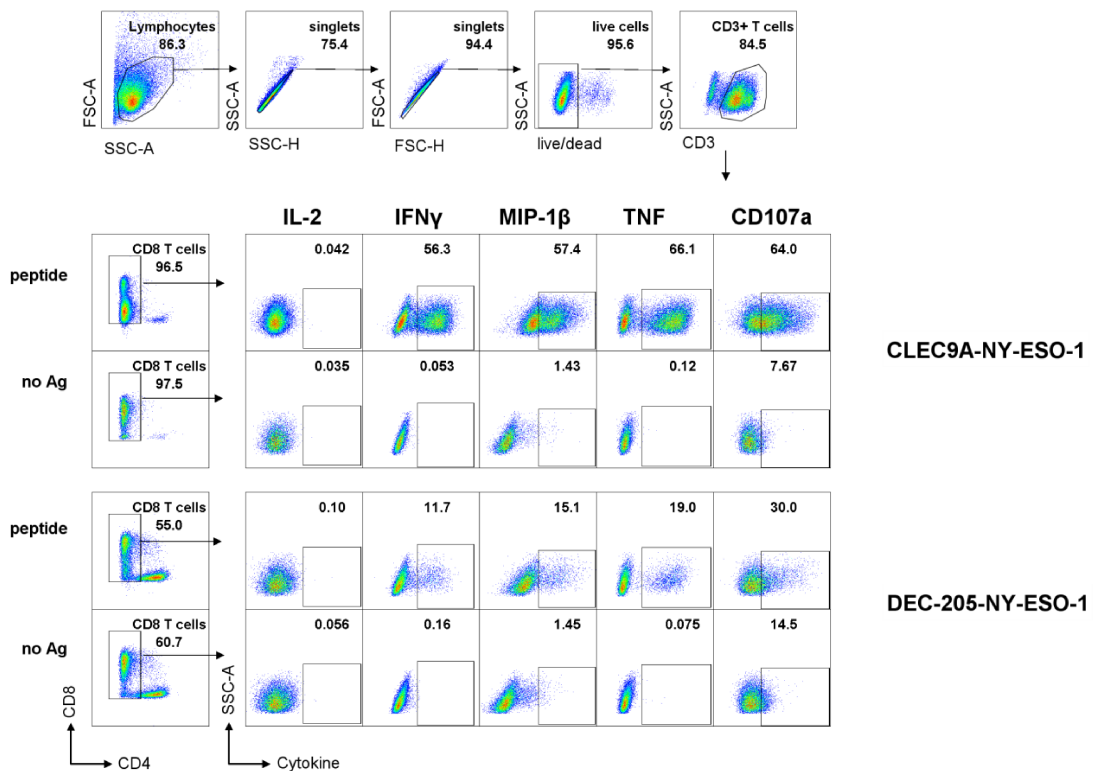

**Supplementary Figure 4.** Related to Figure 6: Gating strategies and controls for intracellular cytokine staining
